# Supplementary material for: Circular RNA Expression Profiles and the Pro-tumorigenic Function of CircRNA_10156 in Hepatitis B Virus-Related Liver Cancer
Source: PubMed Central journal article supplement (PMC7330659; doi:10.7150/ijms.45637), 2020-05-30
Supplement: ijmsv17p1351s1.pdf [file ijmsv17p1351s1.pdf]

*Supplementary materials*

## **Circular RNA Expression Profiles and the Pro-tumorigenic Function of CircRNA\_10156 in Hepatitis B Virus-Related Liver Cancer**

**Man Wang, Bianli Gu, Guoliang Yao, Peifeng Li, Kun Wang**

**Table S1. The primer sequences used for qRT-PCR assay in this study**

| <b>CircRNA ID</b> | <b>Primer sequences (5'-3')</b>                                 |
|-------------------|-----------------------------------------------------------------|
| circRNA_01348     | Forward: TTTTTGGTGAATTCTGTTTGG<br>Reverse: ATCAACTGCCCGAATTCCTT |
| circRNA_01333     | Forward: CTTGGCTGAGATGGTGATAGC<br>Reverse: TCAGCTCTTTTCAGCATTTC |
| circRNA_01690     | Forward: TTTGCTACTGCACCAACAGG<br>Reverse: CTTTTCAGCTCCTGGGGTTT  |
| circRNA_07730     | Forward: TTGGCTCTTCCTCAATGCTT<br>Reverse: GACAAGATTCCGTCTTCATGC |
| circRNA_05876     | Forward: GCATTTTTACGGACCCAATC<br>Reverse: TACTCTCCCATTGCTCCTC   |
| circRNA_04069     | Forward: GCTTGAGTGCTCAGCTGTTCT<br>Reverse: CCCAACAGTCCTCCACAGTC |

|               |                                                                     |
|---------------|---------------------------------------------------------------------|
| circRNA_10583 | Forward: GCCAGGTGCTCCTAAGAAAG<br>Reverse: GCTGAATTTGAACCTTCACACA    |
| circRNA_12640 | Forward: CTTGAGCGCCCTCTACTCAG<br>Reverse: GATCTTCTGGGTGCTGTCGT      |
| circRNA_05466 | Forward: TGTGGCAGAATTGGTTGGTA<br>Reverse: AGTGGTTCCCCAGCTCTTTT      |
| circRNA_11550 | Forward: TGATGGGTATTTGGGCATTT<br>Reverse: GGGCATATGGGAGGGATAGT      |
| circRNA_10156 | Forward: GGTCTTTGAGAAAATCCAGACC<br>Reverse: TTCCTGCTGCACATGTTGAT    |
| miR-149-3p    | Forward: GGTCTTTGAGAAAATCCAGACC<br>Reverse: TTCCTGCTGCACATGTTGAT    |
| <i>Akt1</i>   | Forward: TCCCGAGGCCAAGTCCTT<br>Reverse: CCGCCAAGCCTCTGCTT           |
| <i>GAPDH</i>  | Forward: GAAGGTGAAGGTCGGAGTC<br>Reverse: GAAGATGGTGATGGGATTTC       |
| <i>U6</i>     | Forward: CTCGCTTCGGCAGCACATATACT<br>Reverse: ACGCTTCACGAATTTGCGTGTC |

---



**Figure S1. Histogram presentations of GO classification of circRNA-host genes.** A total of 11,724 (89.33%) circRNA-host genes were classified into three major functional categories (cellular component, molecular function and biological process) and 68 subcategories. The x-axis indicates different GO terms; left y-axis indicates the percentage of genes in a category; right y-axis indicates the number of genes in each category.



**Figure S2. KEGG functional analysis of circRNA-host genes.** The x-axis represents KEGG terms, and the y-axis represents the number of circRNAs. The top 20 KEGG pathways are presented.
